# Supplementary material for: Conjugated small organic molecules: synthesis and characterization of 4-arylpyrazole-decorated dibenzothiophenes
Source: Royal Society of Chemistry journal article supplement (doi:10.1039/d0nj01887b), 2020-01-01

SP-1 18 (0.321) AM (Cen,4, 80.00, Ht,10000.0,0.00,0.00); Cm (18:23)

TOF MS ES+  
1.48e7

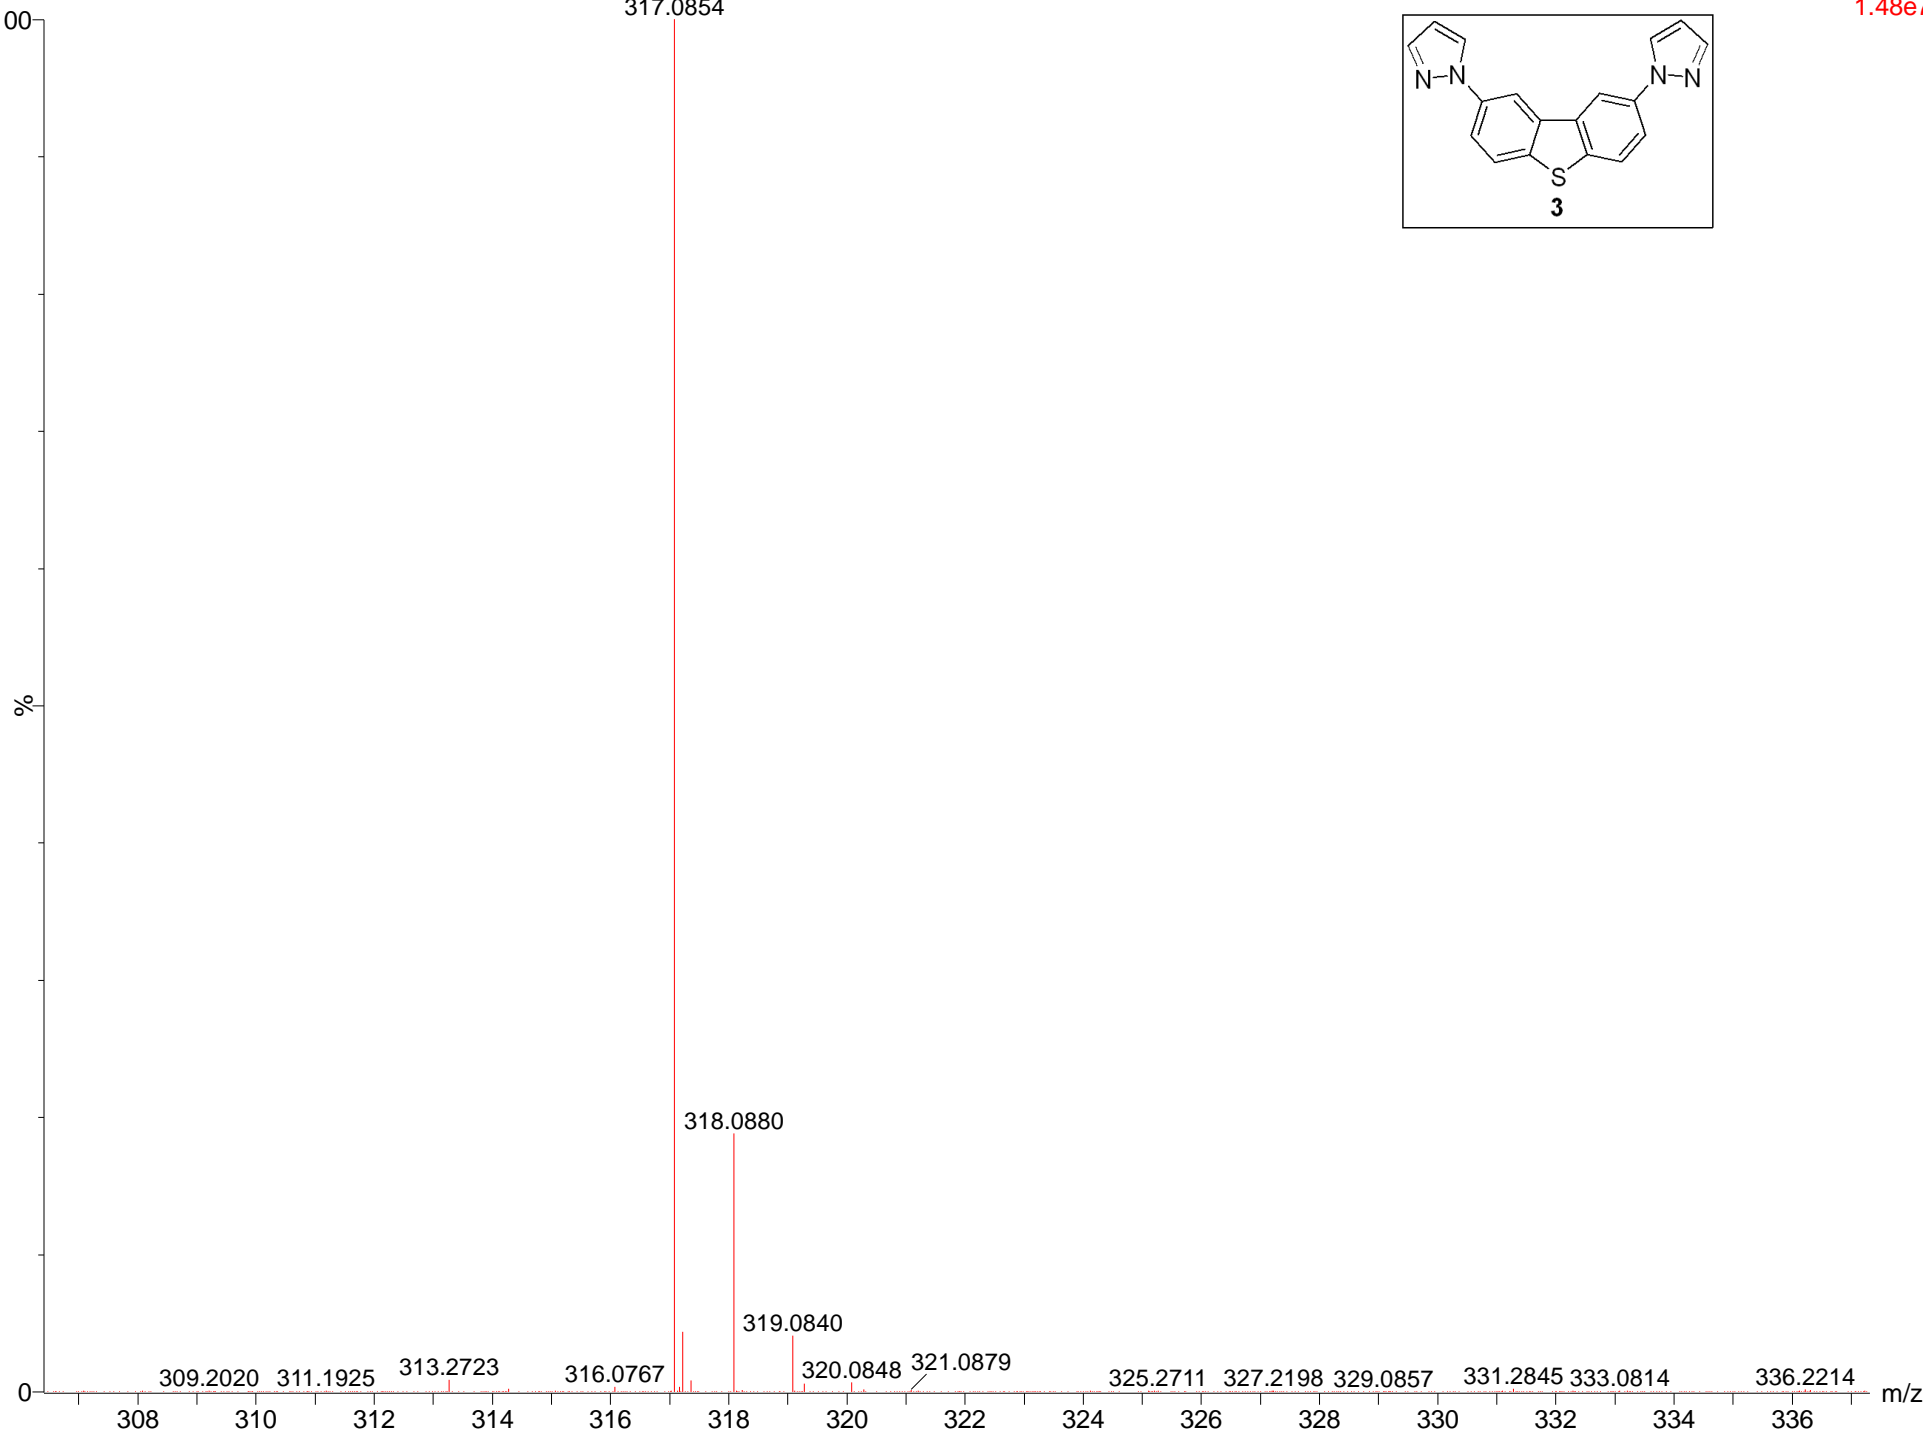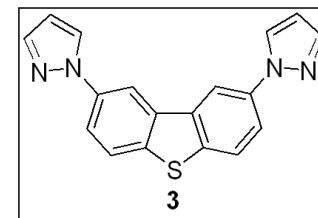

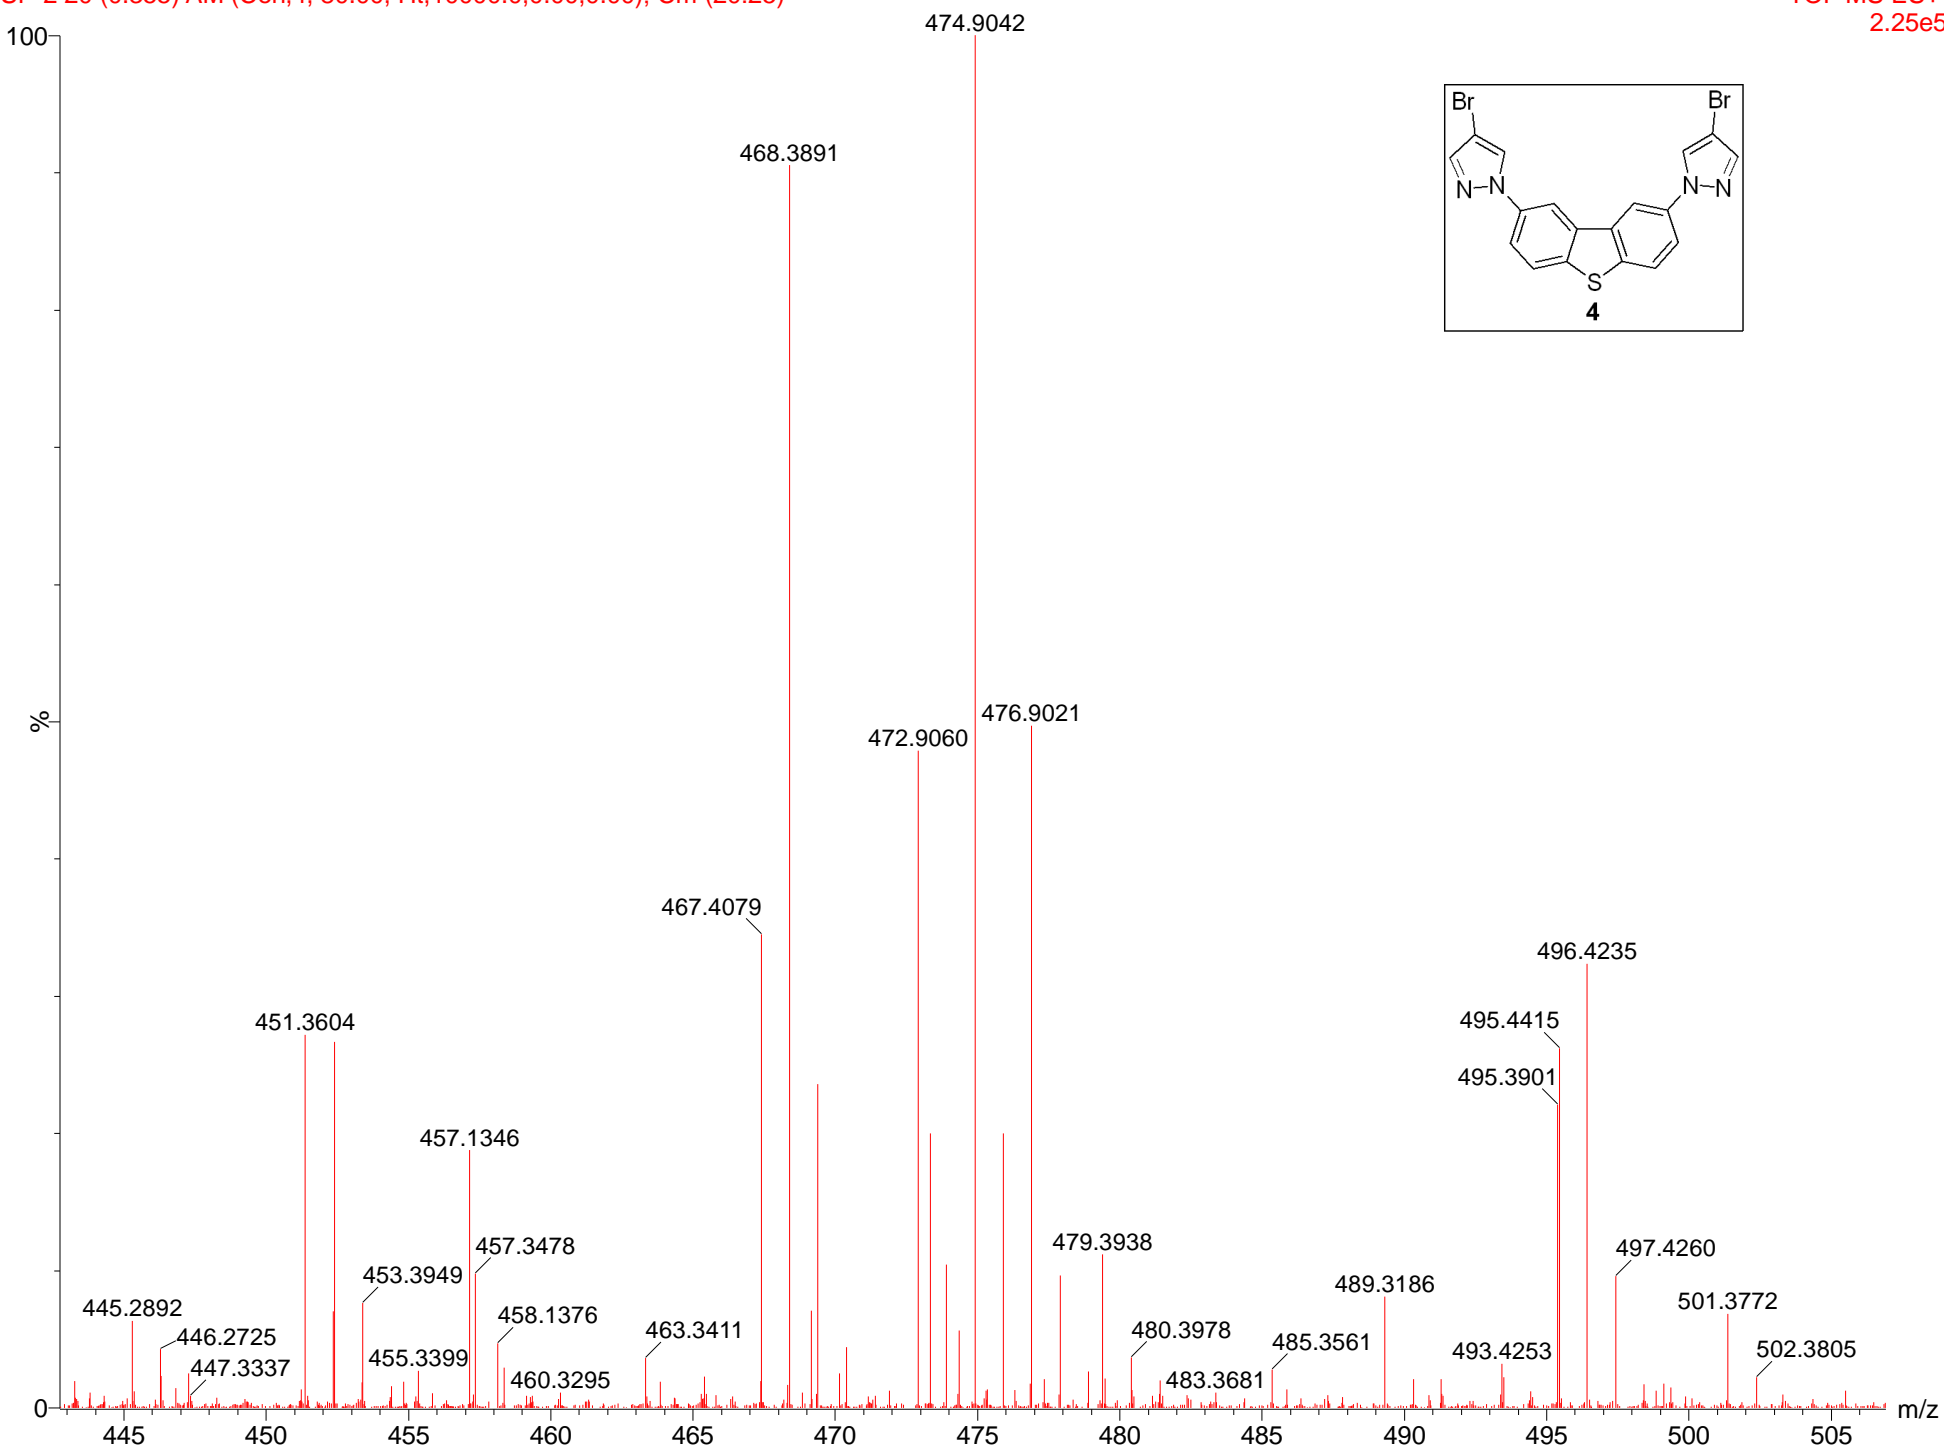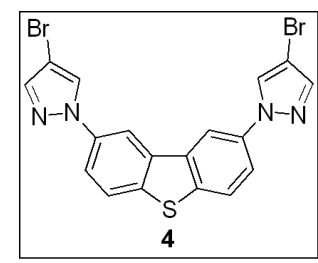

# DEPARTMENT OF CHEMISTRY, I.I.T.(B)

## Analysis Info

Analysis Name D:\Data\JULY-19\rm-pp-01-52.d  
Method Tune\_pos\_1000a\_NAF-05-07-2019.m  
Sample Name rm-pp-01-52  
Comment lrms

Acquisition Date 7/30/2019 5:58:26 PM

Operator PG OUT  
Instrument maXis impact 282001.00081

## Acquisition Parameter

|             |          |                      |          |                  |           |
|-------------|----------|----------------------|----------|------------------|-----------|
| Source Type | ESI      | Ion Polarity         | Positive | Set Nebulizer    | 0.4 Bar   |
| Focus       | Active   | Set Capillary        | 4000 V   | Set Dry Heater   | 180 °C    |
| Scan Begin  | 50 m/z   | Set End Plate Offset | -500 V   | Set Dry Gas      | 4.0 l/min |
| Scan End    | 1000 m/z | Set Charging Voltage | 2000 V   | Set Divert Valve | Source    |
|             |          | Set Corona           | 0 nA     | Set APCI Heater  | 0 °C      |

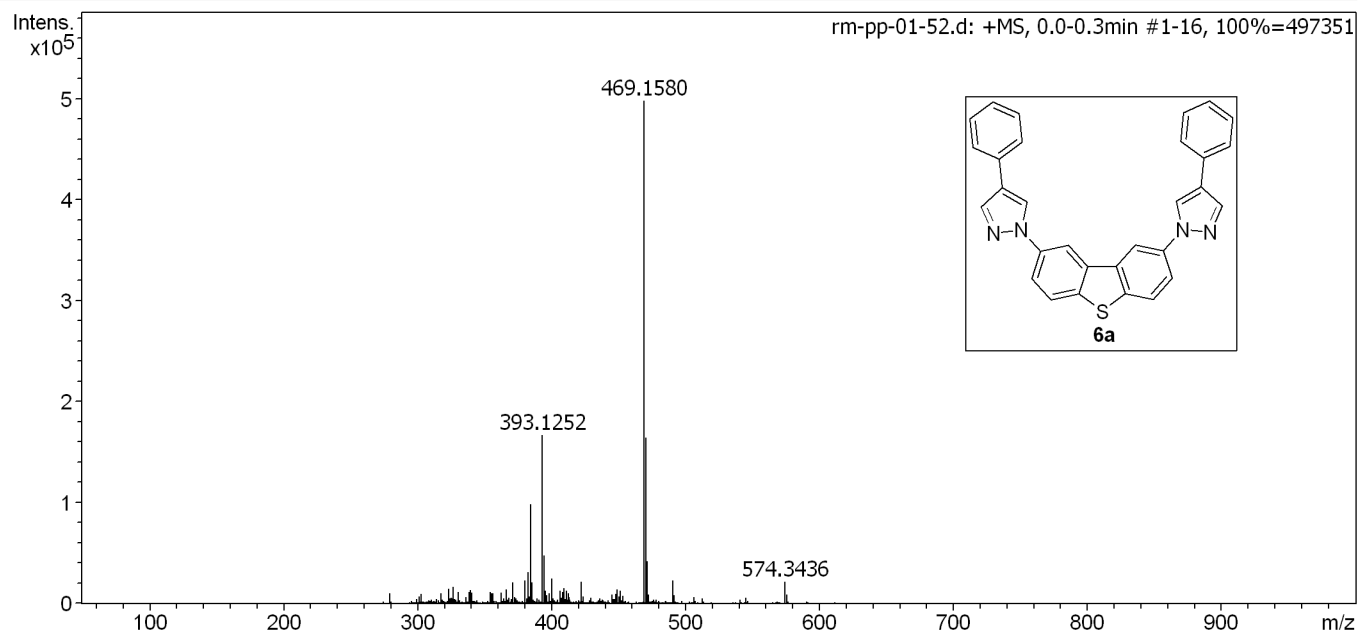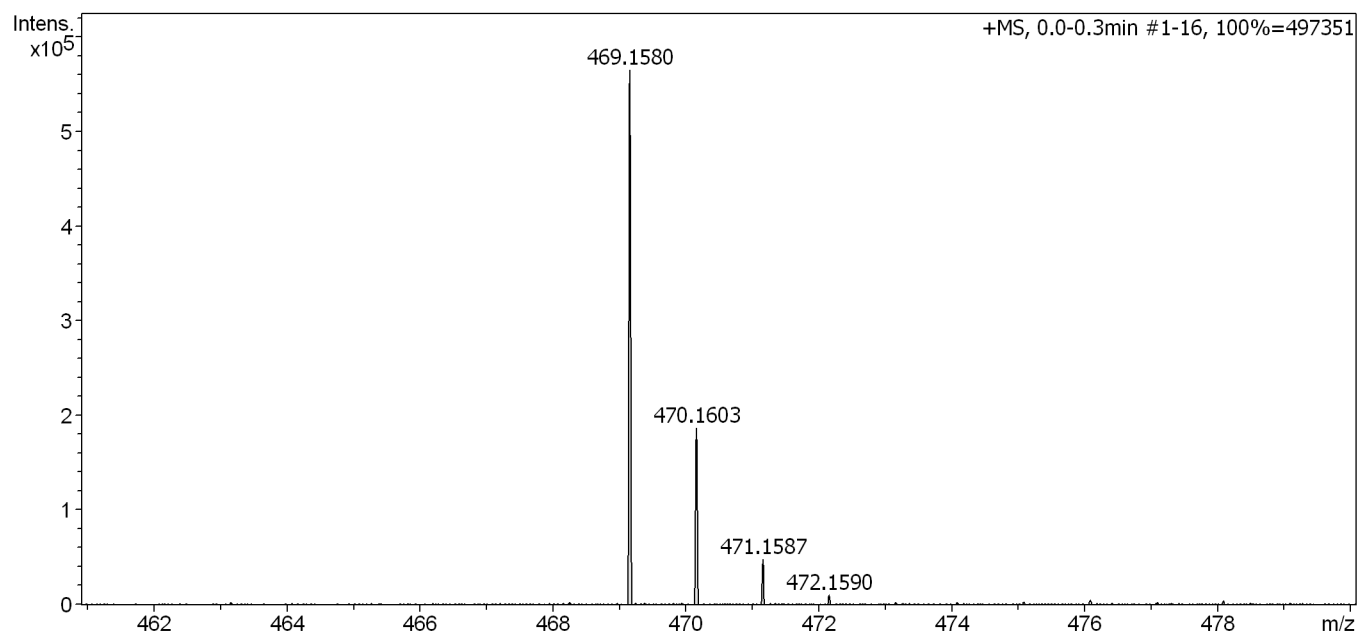

# DEPARTMENT OF CHEMISTRY, I.I.T.(B)

**Analysis Info**

Analysis Name D:\Data\AUG-19\RM-PP-04.d  
 Method Tune\_pos\_1000a\_NAF-05-07-2019.m  
 Sample Name RM-PP-04  
 Comment C32H24N4S

Acquisition Date 8/13/2019 3:57:57 PM  
 Operator INN out  
 Instrument maXis impact 282001.00081

**Acquisition Parameter**

|             |         |                       |            |                  |           |
|-------------|---------|-----------------------|------------|------------------|-----------|
| Source Type | ESI     | Ion Polarity          | Positive   | Set Nebulizer    | 0.4 Bar   |
| Focus       | Active  | Set Capillary         | 4000 V     | Set Dry Heater   | 180 °C    |
| Scan Begin  | 50 m/z  | Set End Plate Offset  | -500 V     | Set Dry Gas      | 4.0 l/min |
| Scan End    | 700 m/z | Set Collision Cell RF | 1200.0 Vpp | Set Divert Valve | Source    |

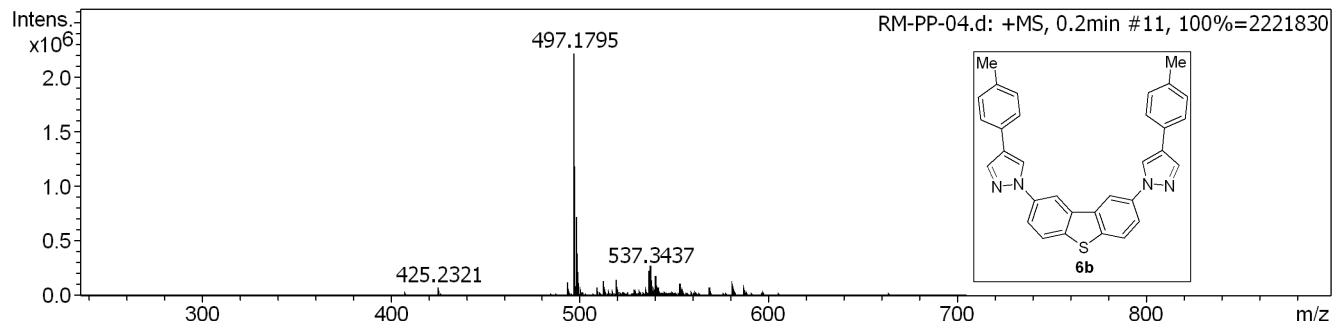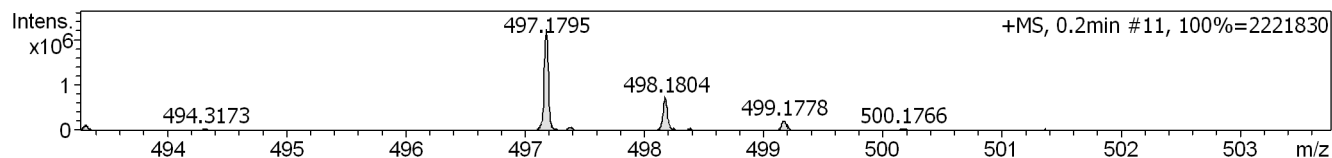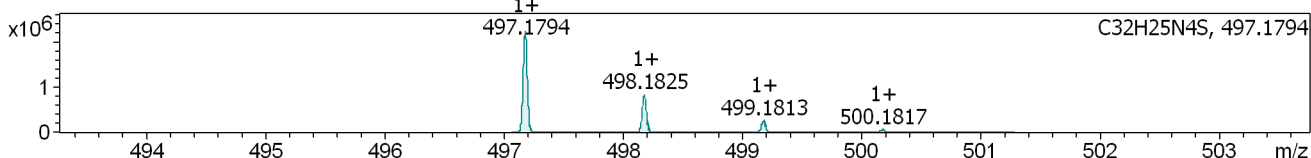

| Meas. m/z | # | Ion Formula | m/z      | err [ppm] | mSigma | # Sigma | Score  | rdb  | e <sup>-</sup> Conf | N-Rule |
|-----------|---|-------------|----------|-----------|--------|---------|--------|------|---------------------|--------|
| 497.1795  | 1 | C32H25N4S   | 497.1794 | 0.0       | 22.4   | 1       | 100.00 | 22.5 | even                | ok     |

SG-I-114F

SG-I-114F 10 (0.212) AM2 (Ar,22000.0,556.28,0.00,LS 3)

1: TOF MS ES+  
9.03e5

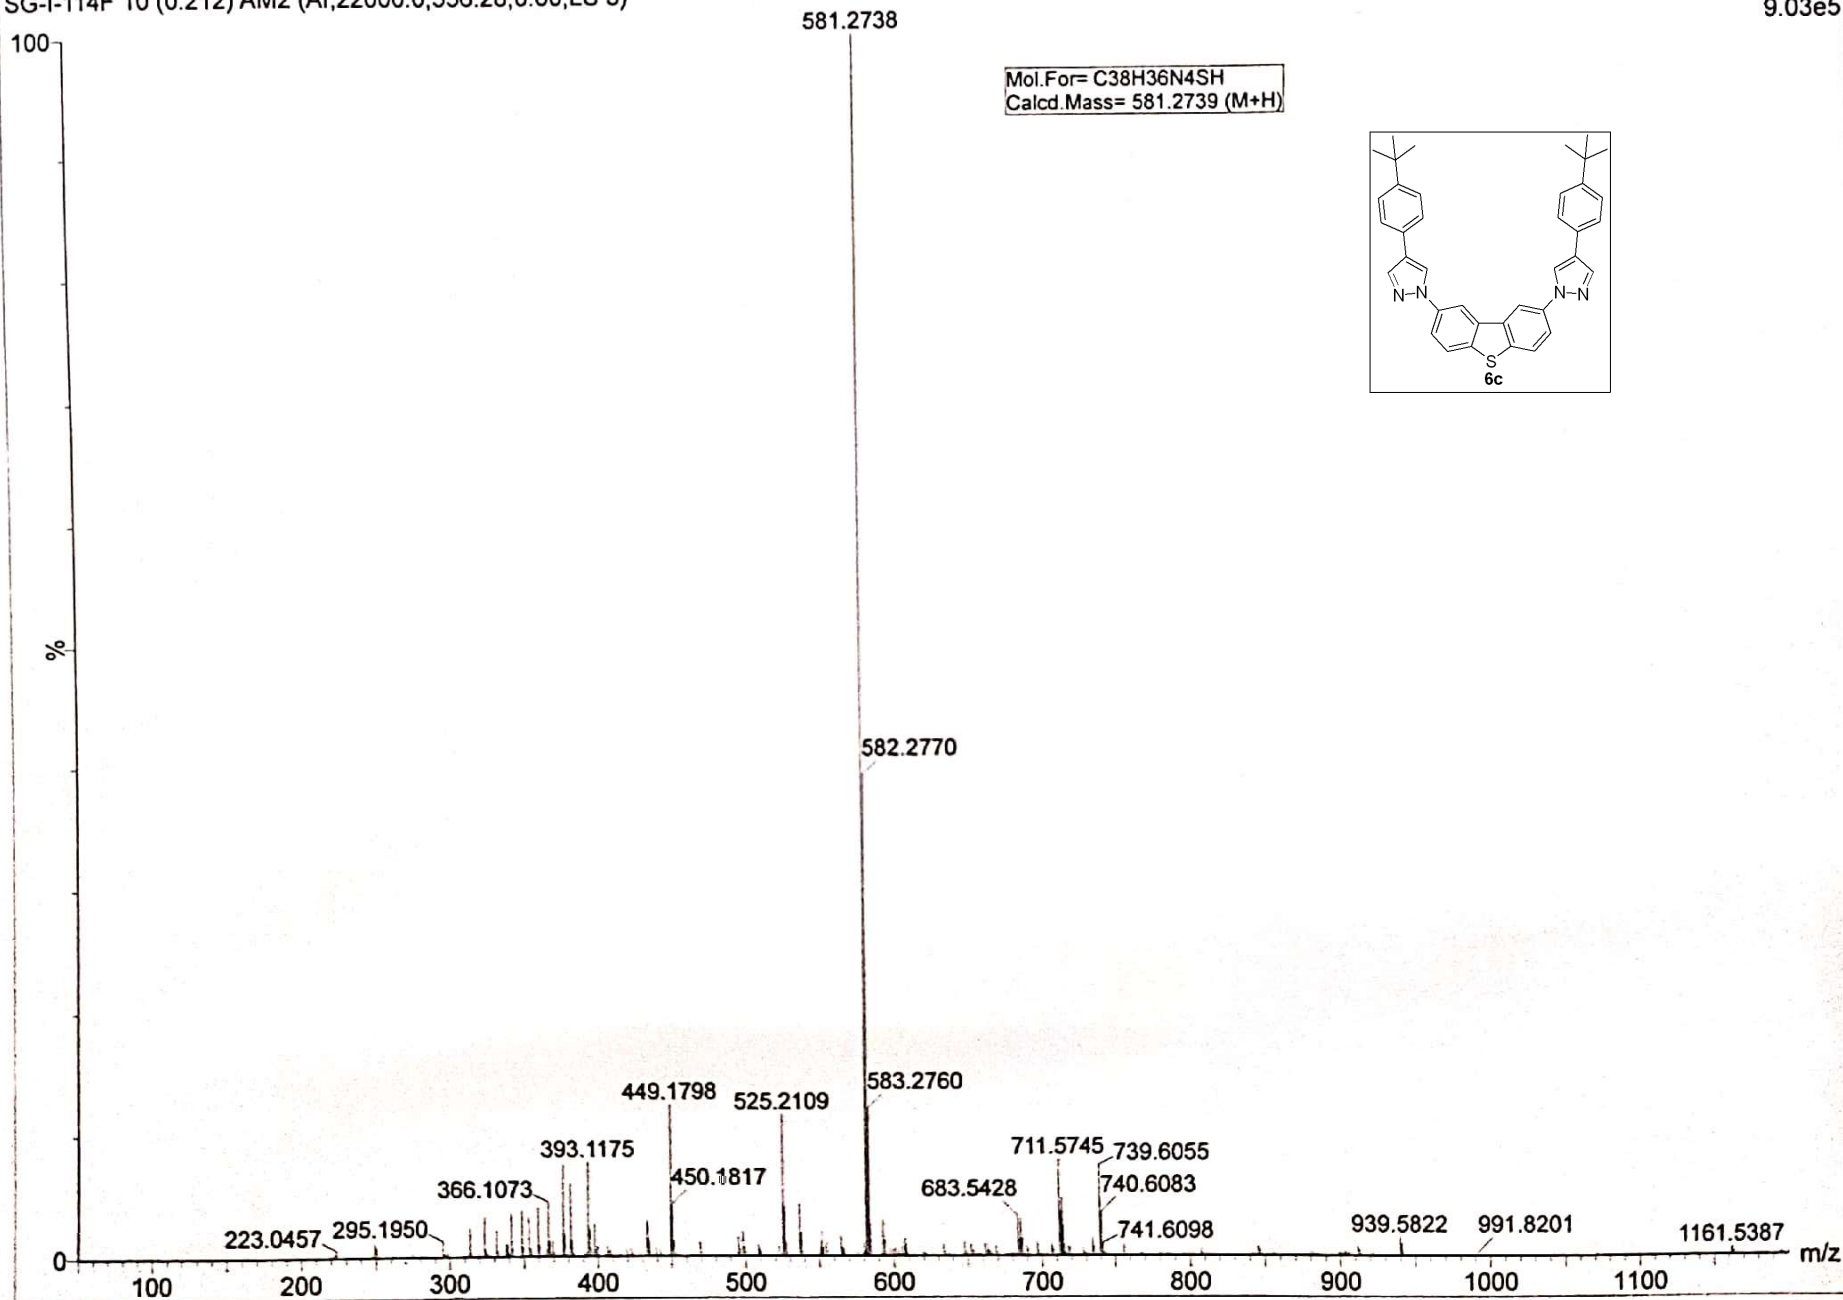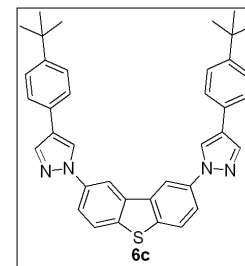

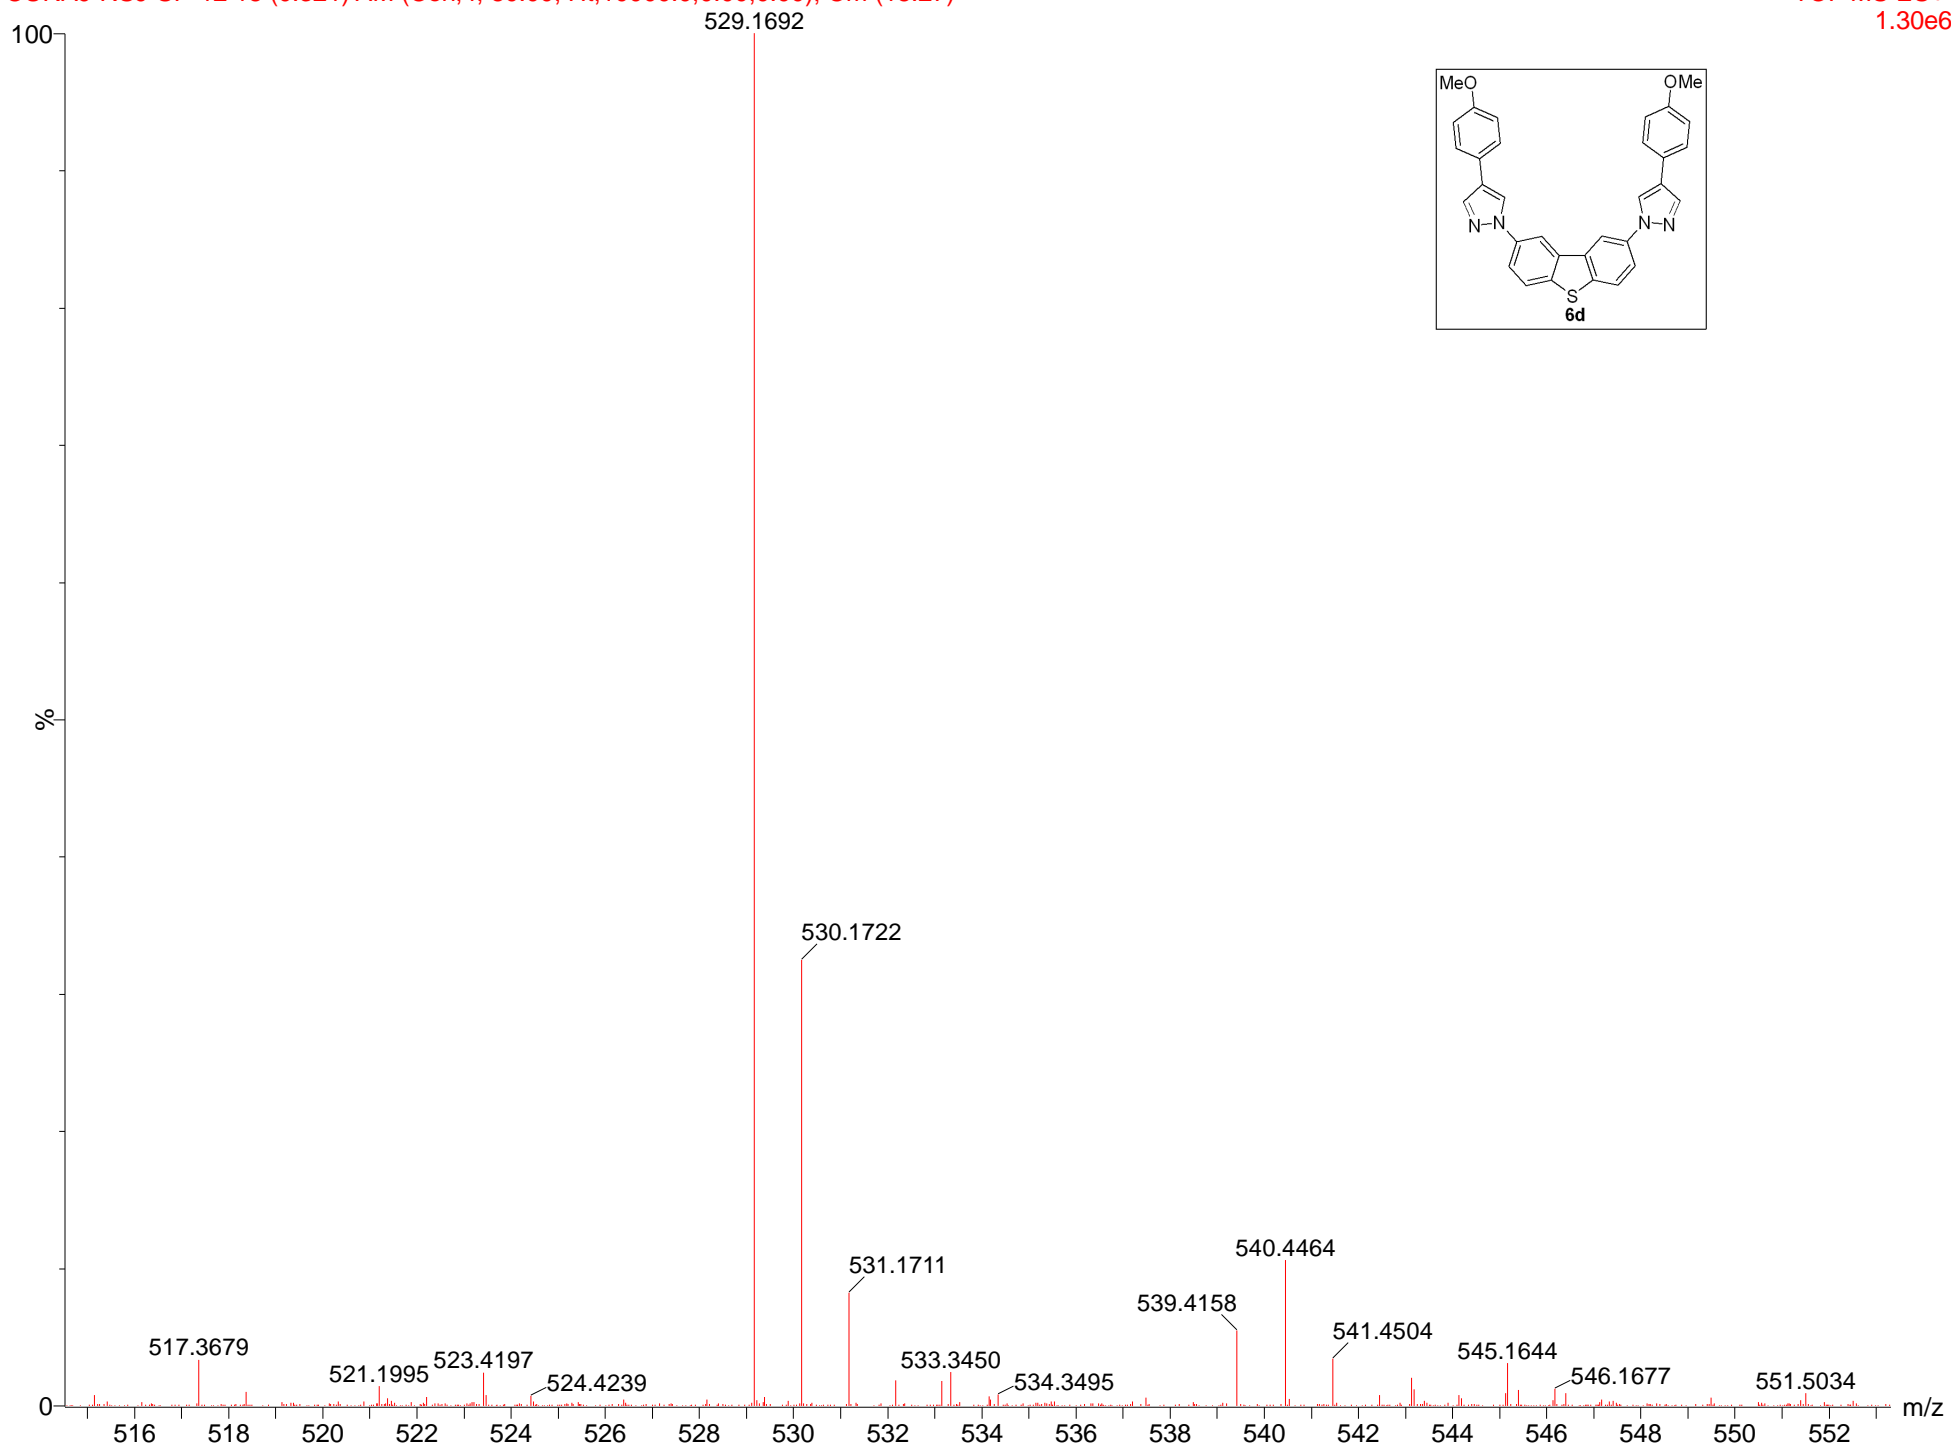

SP-4 17 (0.304) AM (Cen,4, 80.00, Ht,10000.0,0.00,0.00); Cm (17:21)

TOF MS ES+  
3.05e5

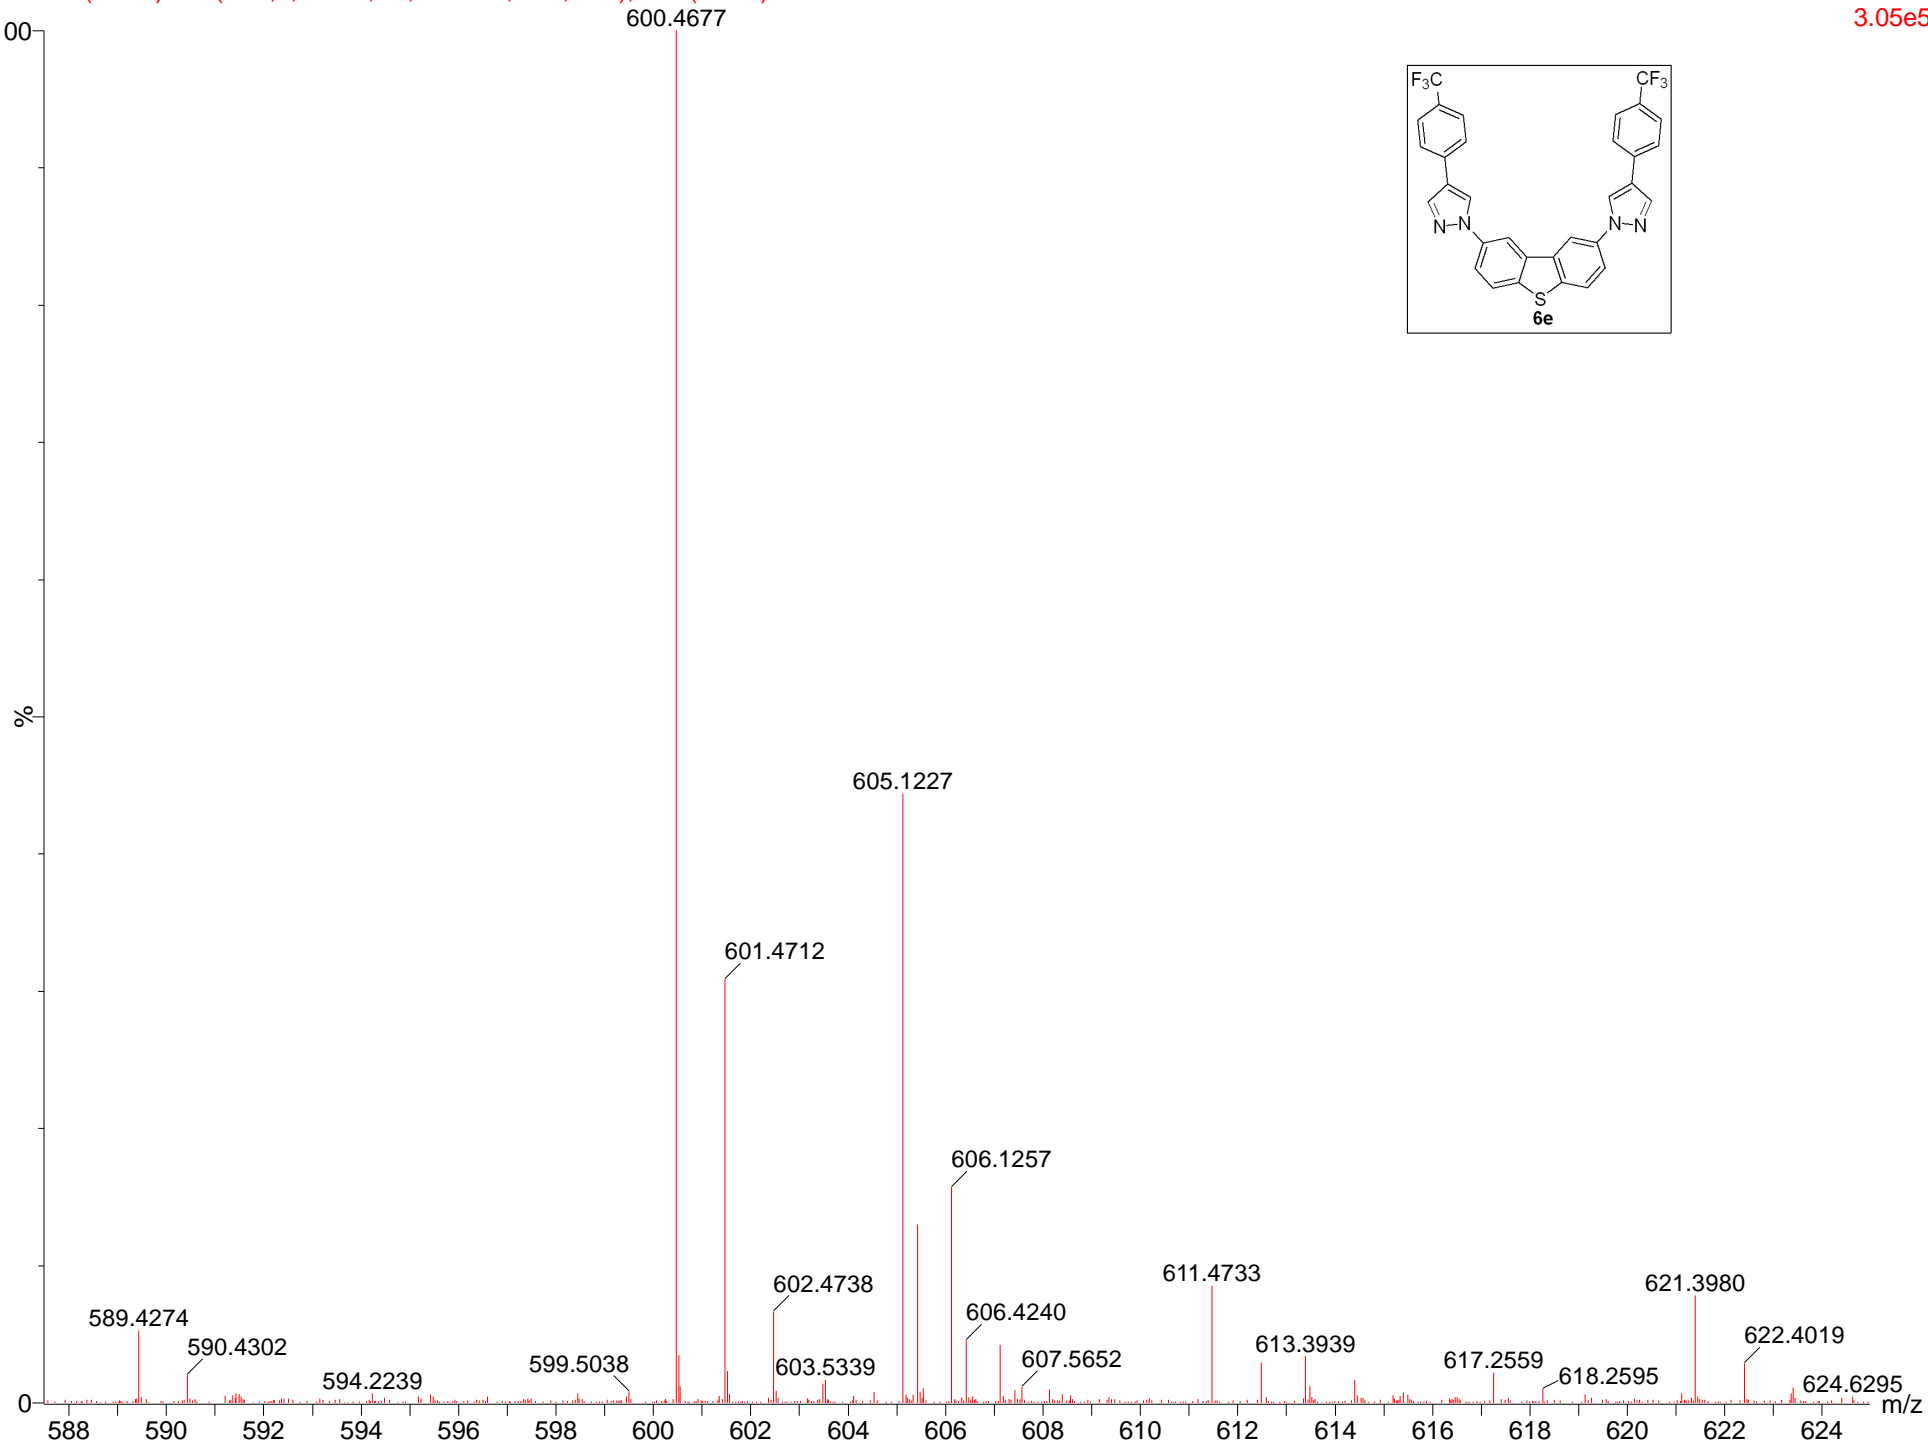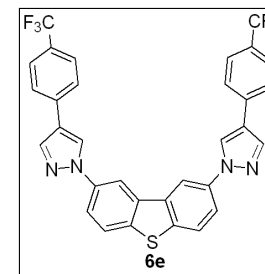

# DEPARTMENT OF CHEMISTRY, I.I.T.(B)

## Analysis Info

Analysis Name D:\Data\AUG-19\rm-pp-07.d  
 Method Tune\_pos\_NAICSI-1000a.m  
 Sample Name rm-pp-07  
 Comment LRMS

Acquisition Date 8/8/2019 1:43:35 PM

Operator PG SRD IN  
 Instrument maXis impact 282001.00081

## Acquisition Parameter

|             |          |                      |          |                  |           |
|-------------|----------|----------------------|----------|------------------|-----------|
| Source Type | ESI      | Ion Polarity         | Positive | Set Nebulizer    | 0.3 Bar   |
| Focus       | Active   | Set Capillary        | 4500 V   | Set Dry Heater   | 180 °C    |
| Scan Begin  | 50 m/z   | Set End Plate Offset | -500 V   | Set Dry Gas      | 4.0 l/min |
| Scan End    | 1000 m/z | Set Charging Voltage | 2000 V   | Set Divert Valve | Source    |
|             |          | Set Corona           | 0 nA     | Set APCI Heater  | 0 °C      |

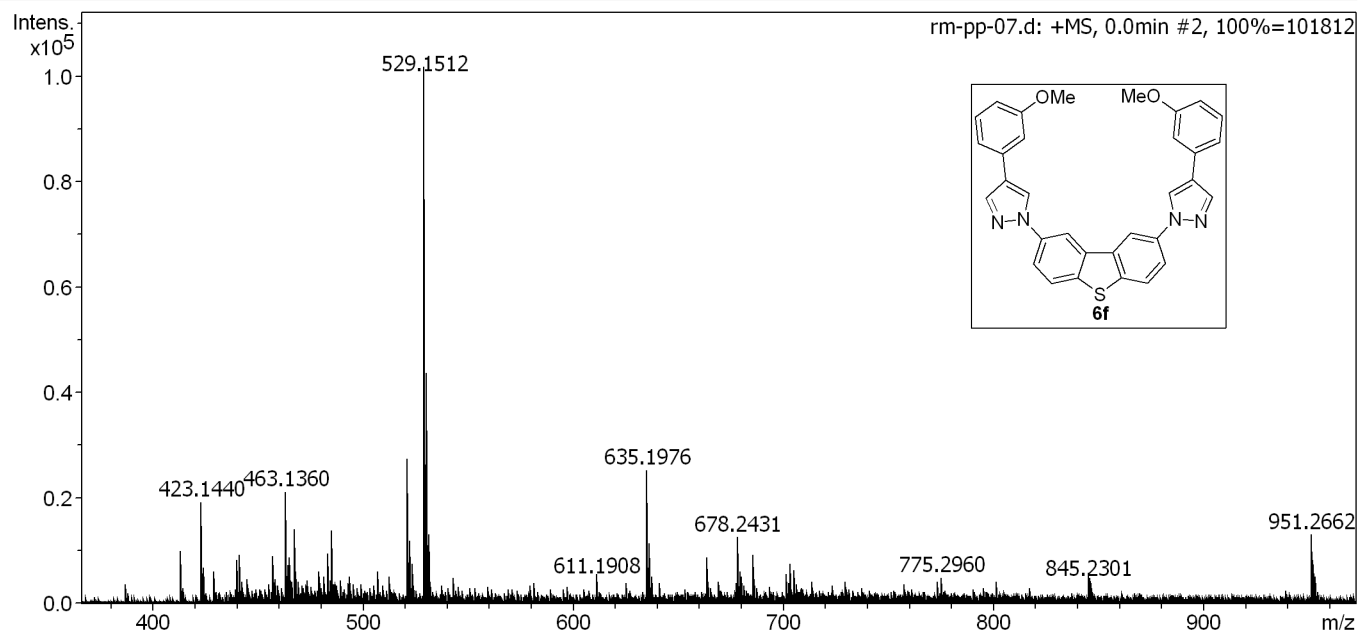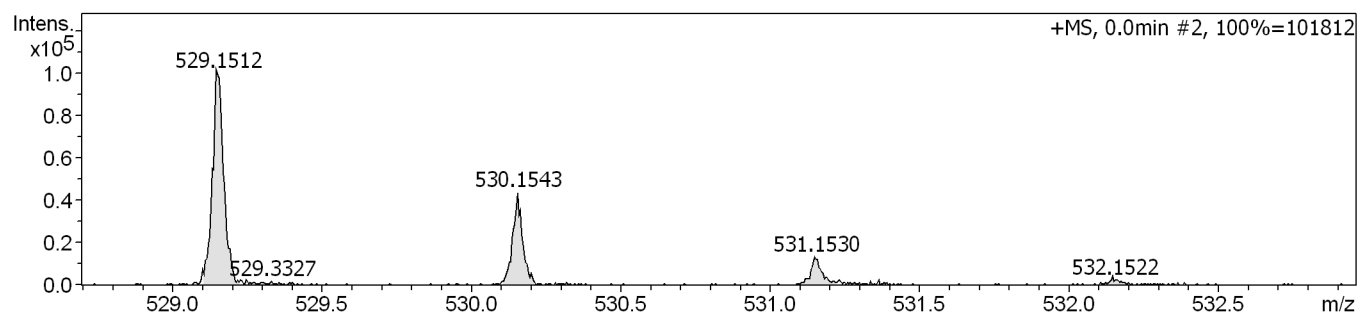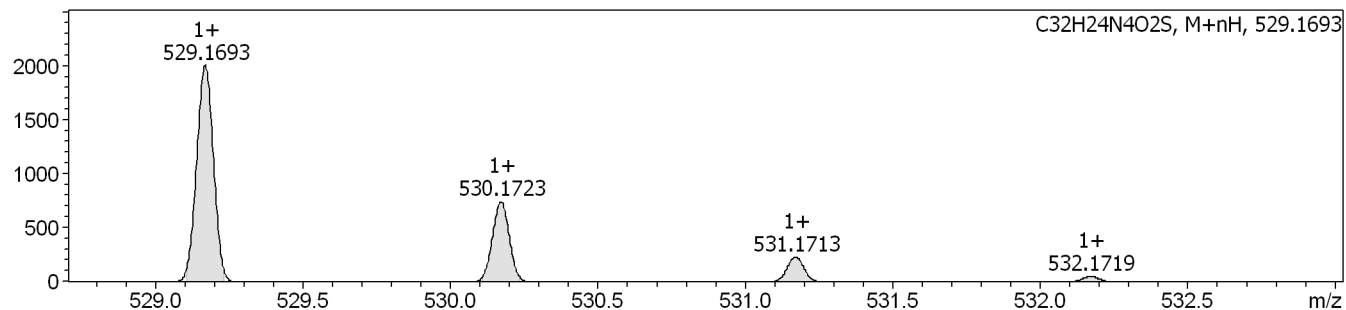





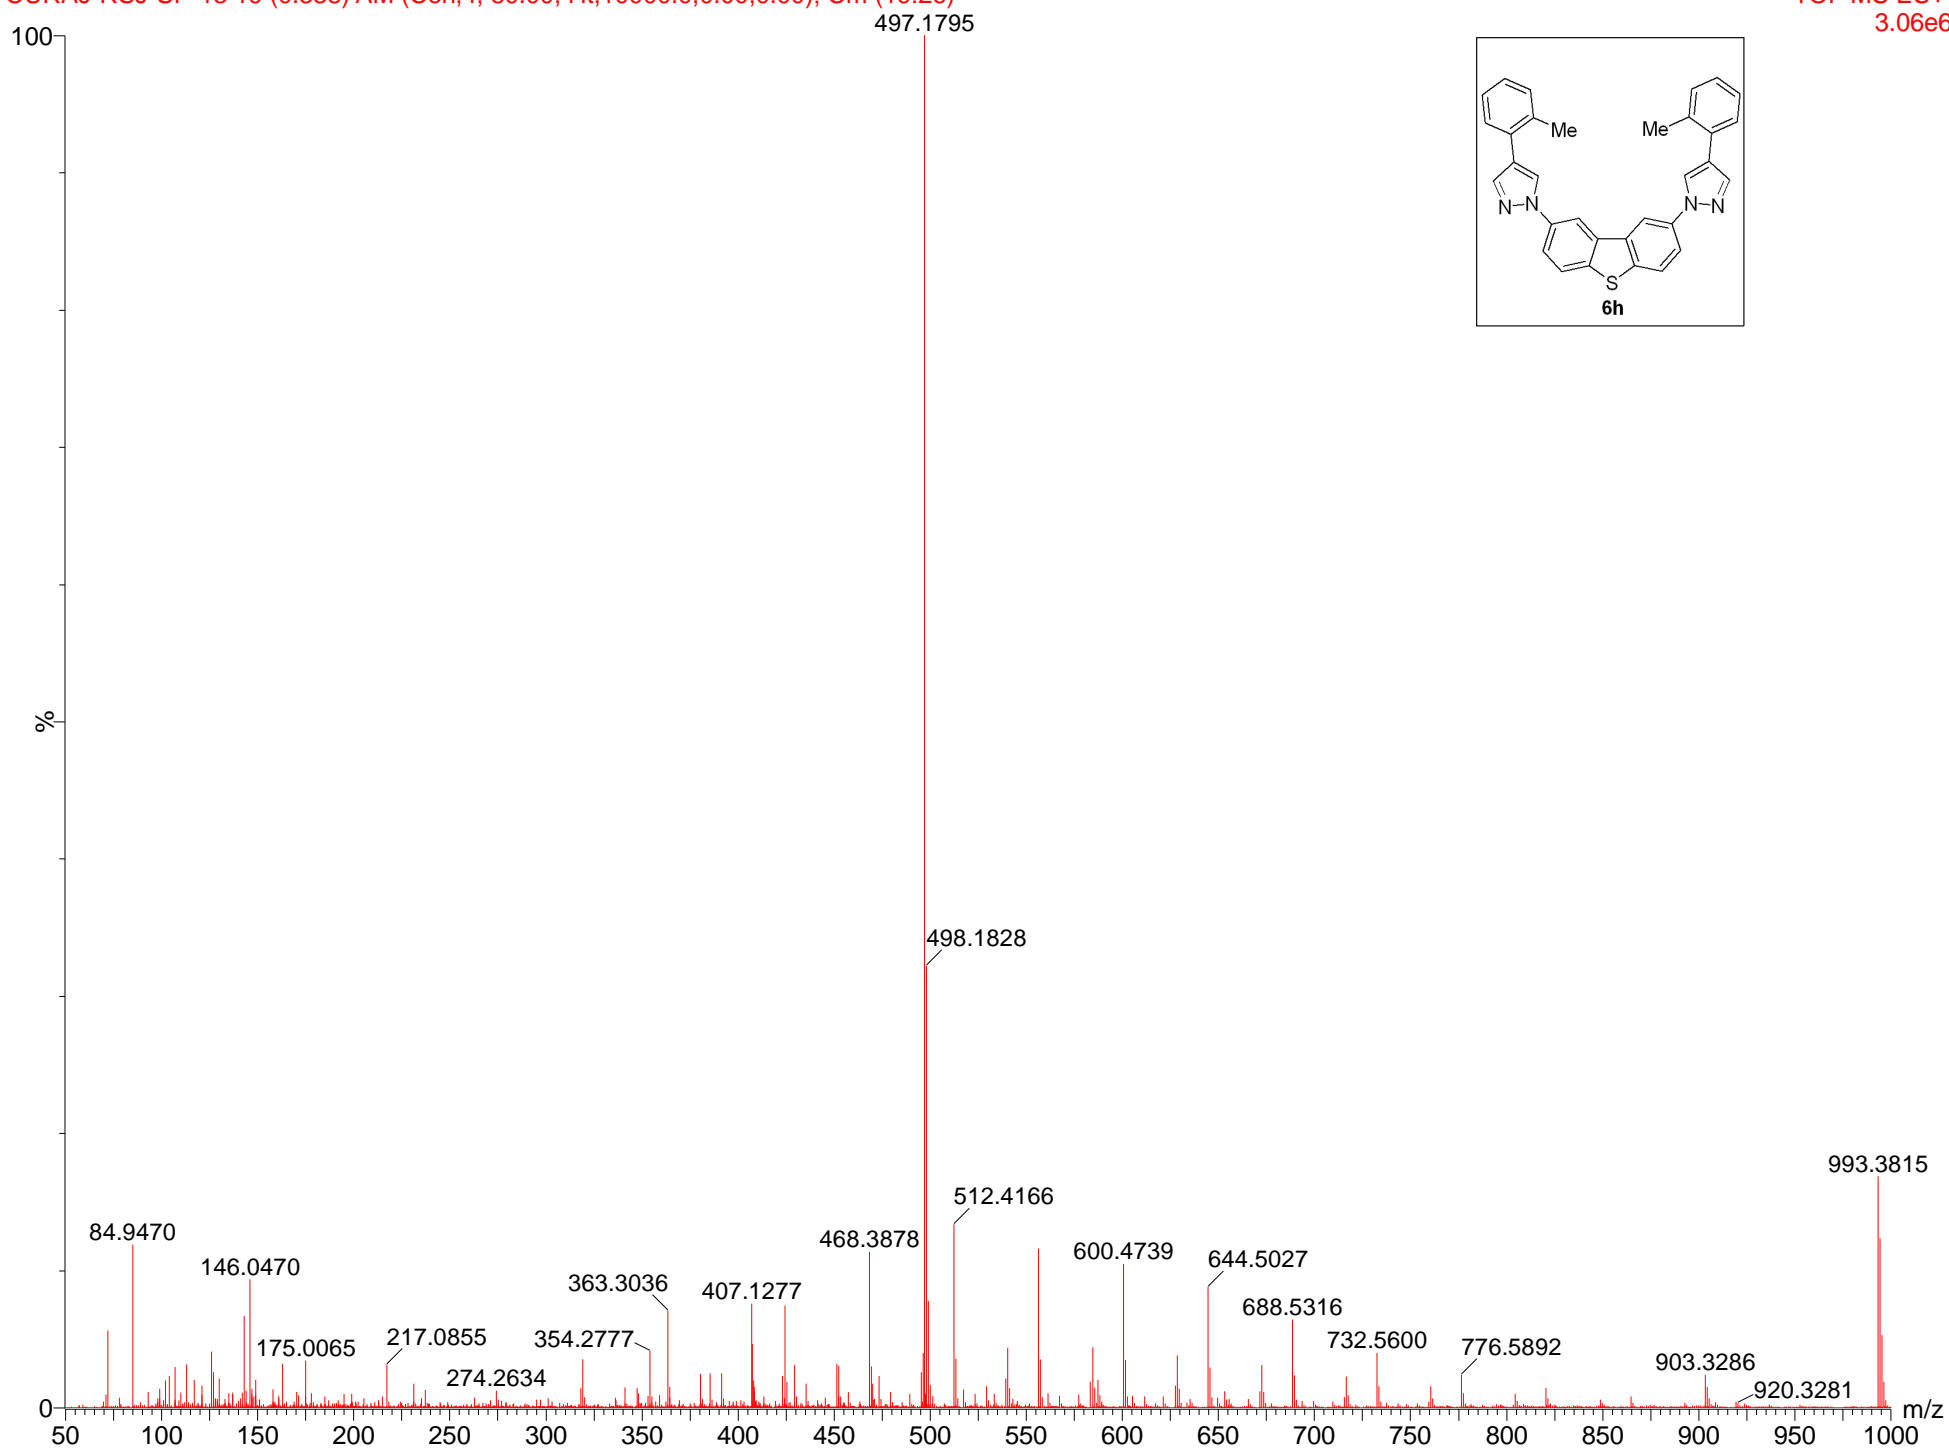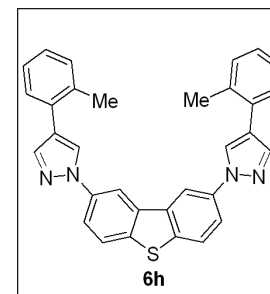

# DEPARTMENT OF CHEMISTRY, I.I.T.(B)

## Analysis Info

Analysis Name D:\Data\AUG-19\RM-PP-10.d  
Method Tune\_pos\_1000a\_NAF-05-07-2019.m  
Sample Name RM-PP-10  
Comment LRMS

Acquisition Date 8/6/2019 7:24:39 PM

Operator PG SRD IN  
Instrument maXis impact 282001.00081

## Acquisition Parameter

|             |          |                      |          |                  |           |
|-------------|----------|----------------------|----------|------------------|-----------|
| Source Type | ESI      | Ion Polarity         | Positive | Set Nebulizer    | 0.4 Bar   |
| Focus       | Active   | Set Capillary        | 4000 V   | Set Dry Heater   | 180 °C    |
| Scan Begin  | 50 m/z   | Set End Plate Offset | -500 V   | Set Dry Gas      | 4.0 l/min |
| Scan End    | 1000 m/z | Set Charging Voltage | 2000 V   | Set Divert Valve | Source    |
|             |          | Set Corona           | 0 nA     | Set APCI Heater  | 0 °C      |

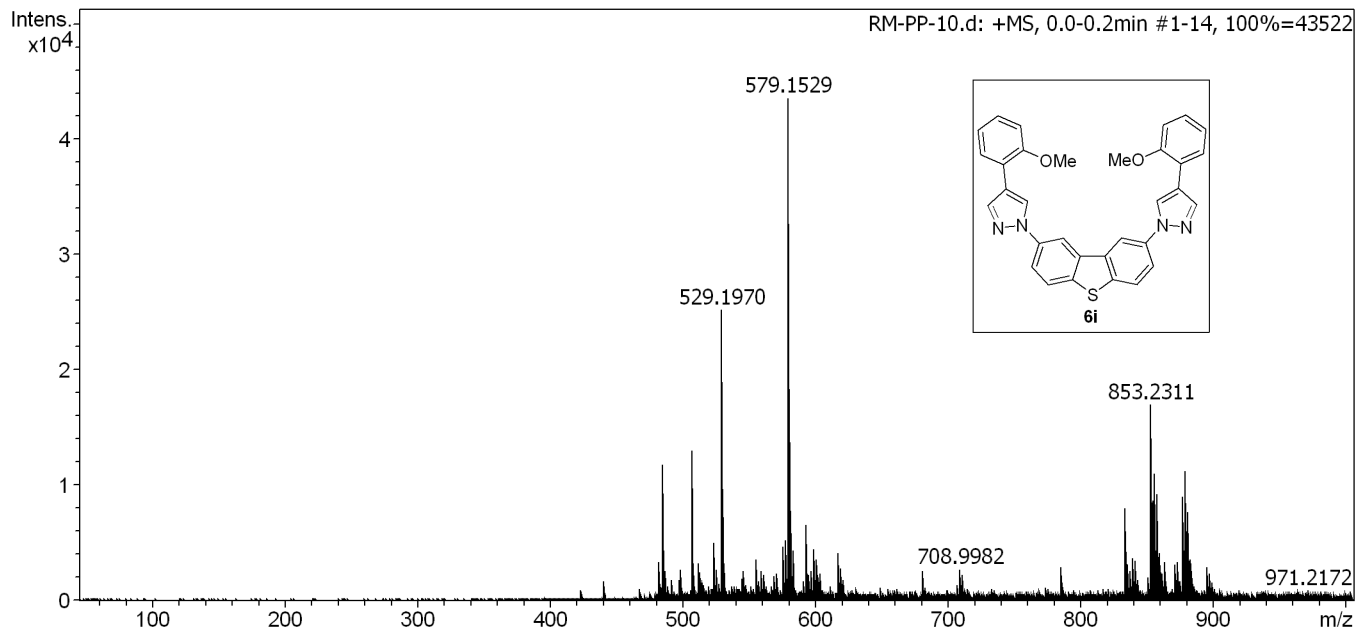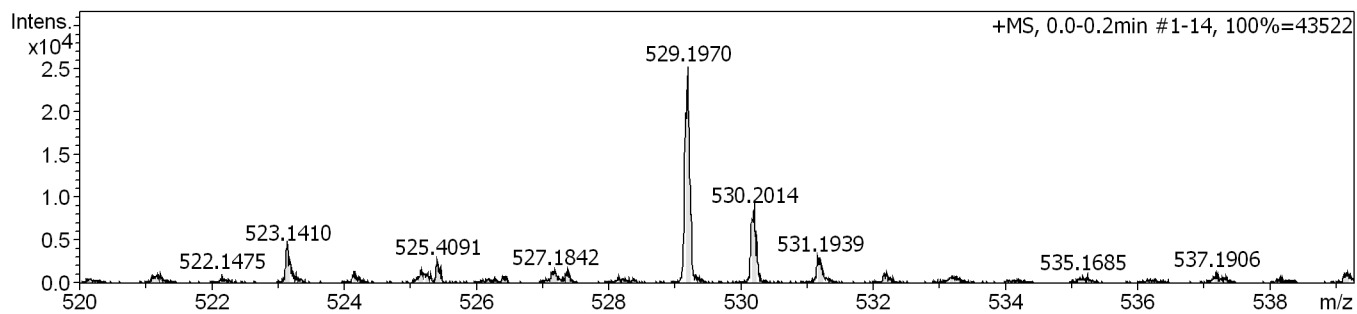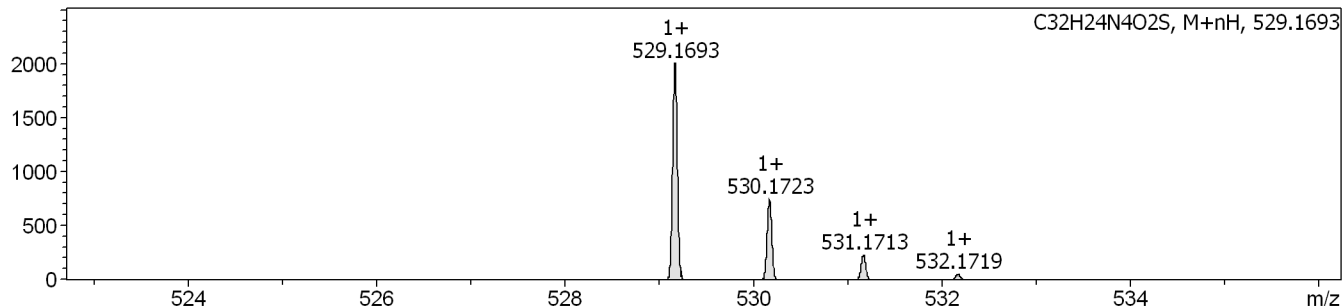

SG-I-78

SG-I-78 18 (0.360) AM2 (Ar,22000.0,556.28,0.00,LS 3)

1: TOF MS ES+  
7.89e5

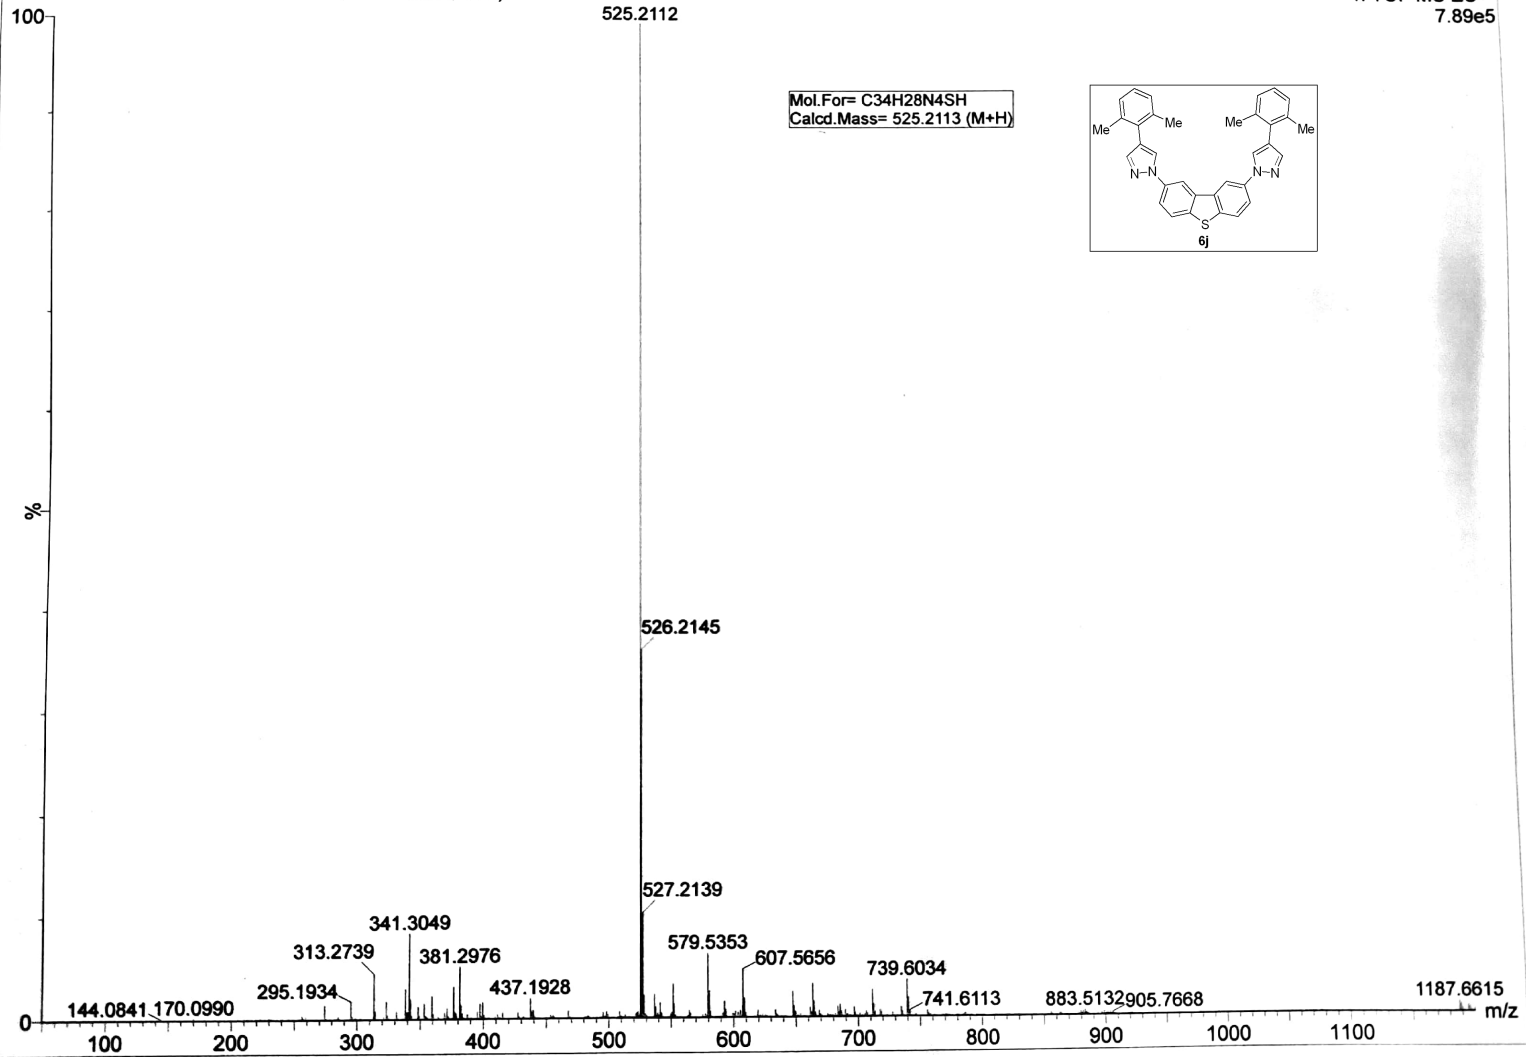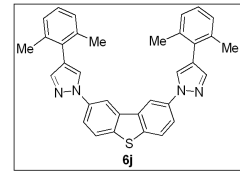

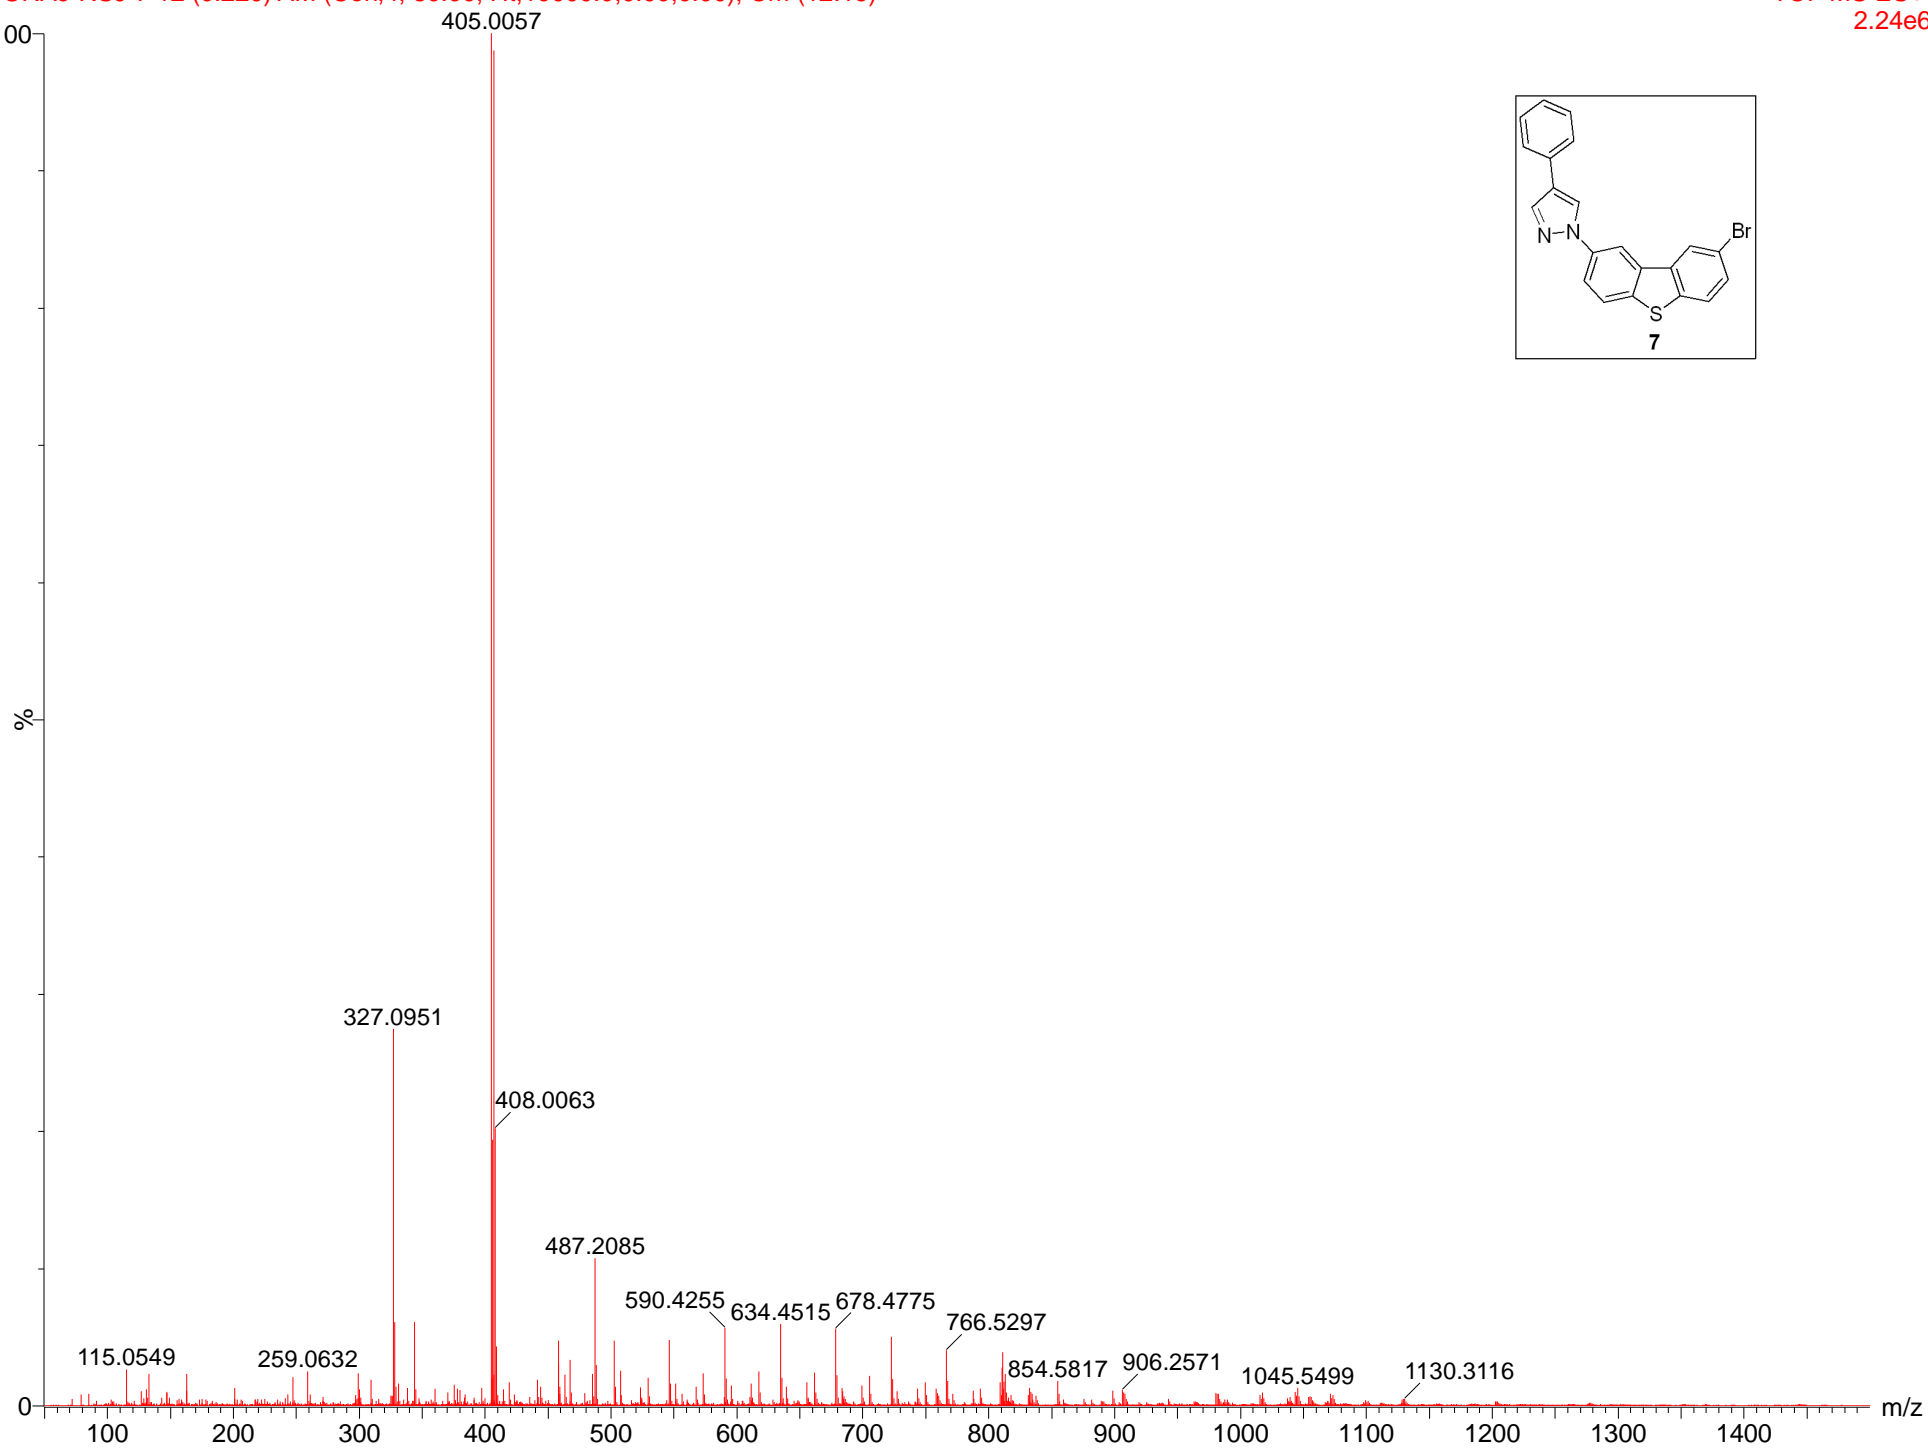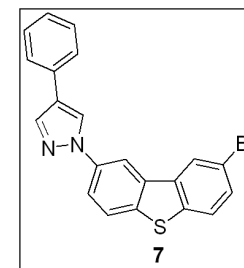

SP-6 15 (0.271) AM (Cen,4, 80.00, Ht,10000.0,0.00,0.00); Cm (15:22)

TOF MS ES+  
2.67e4

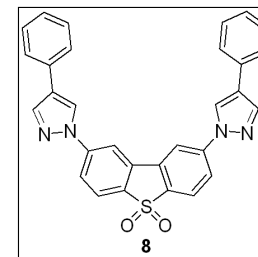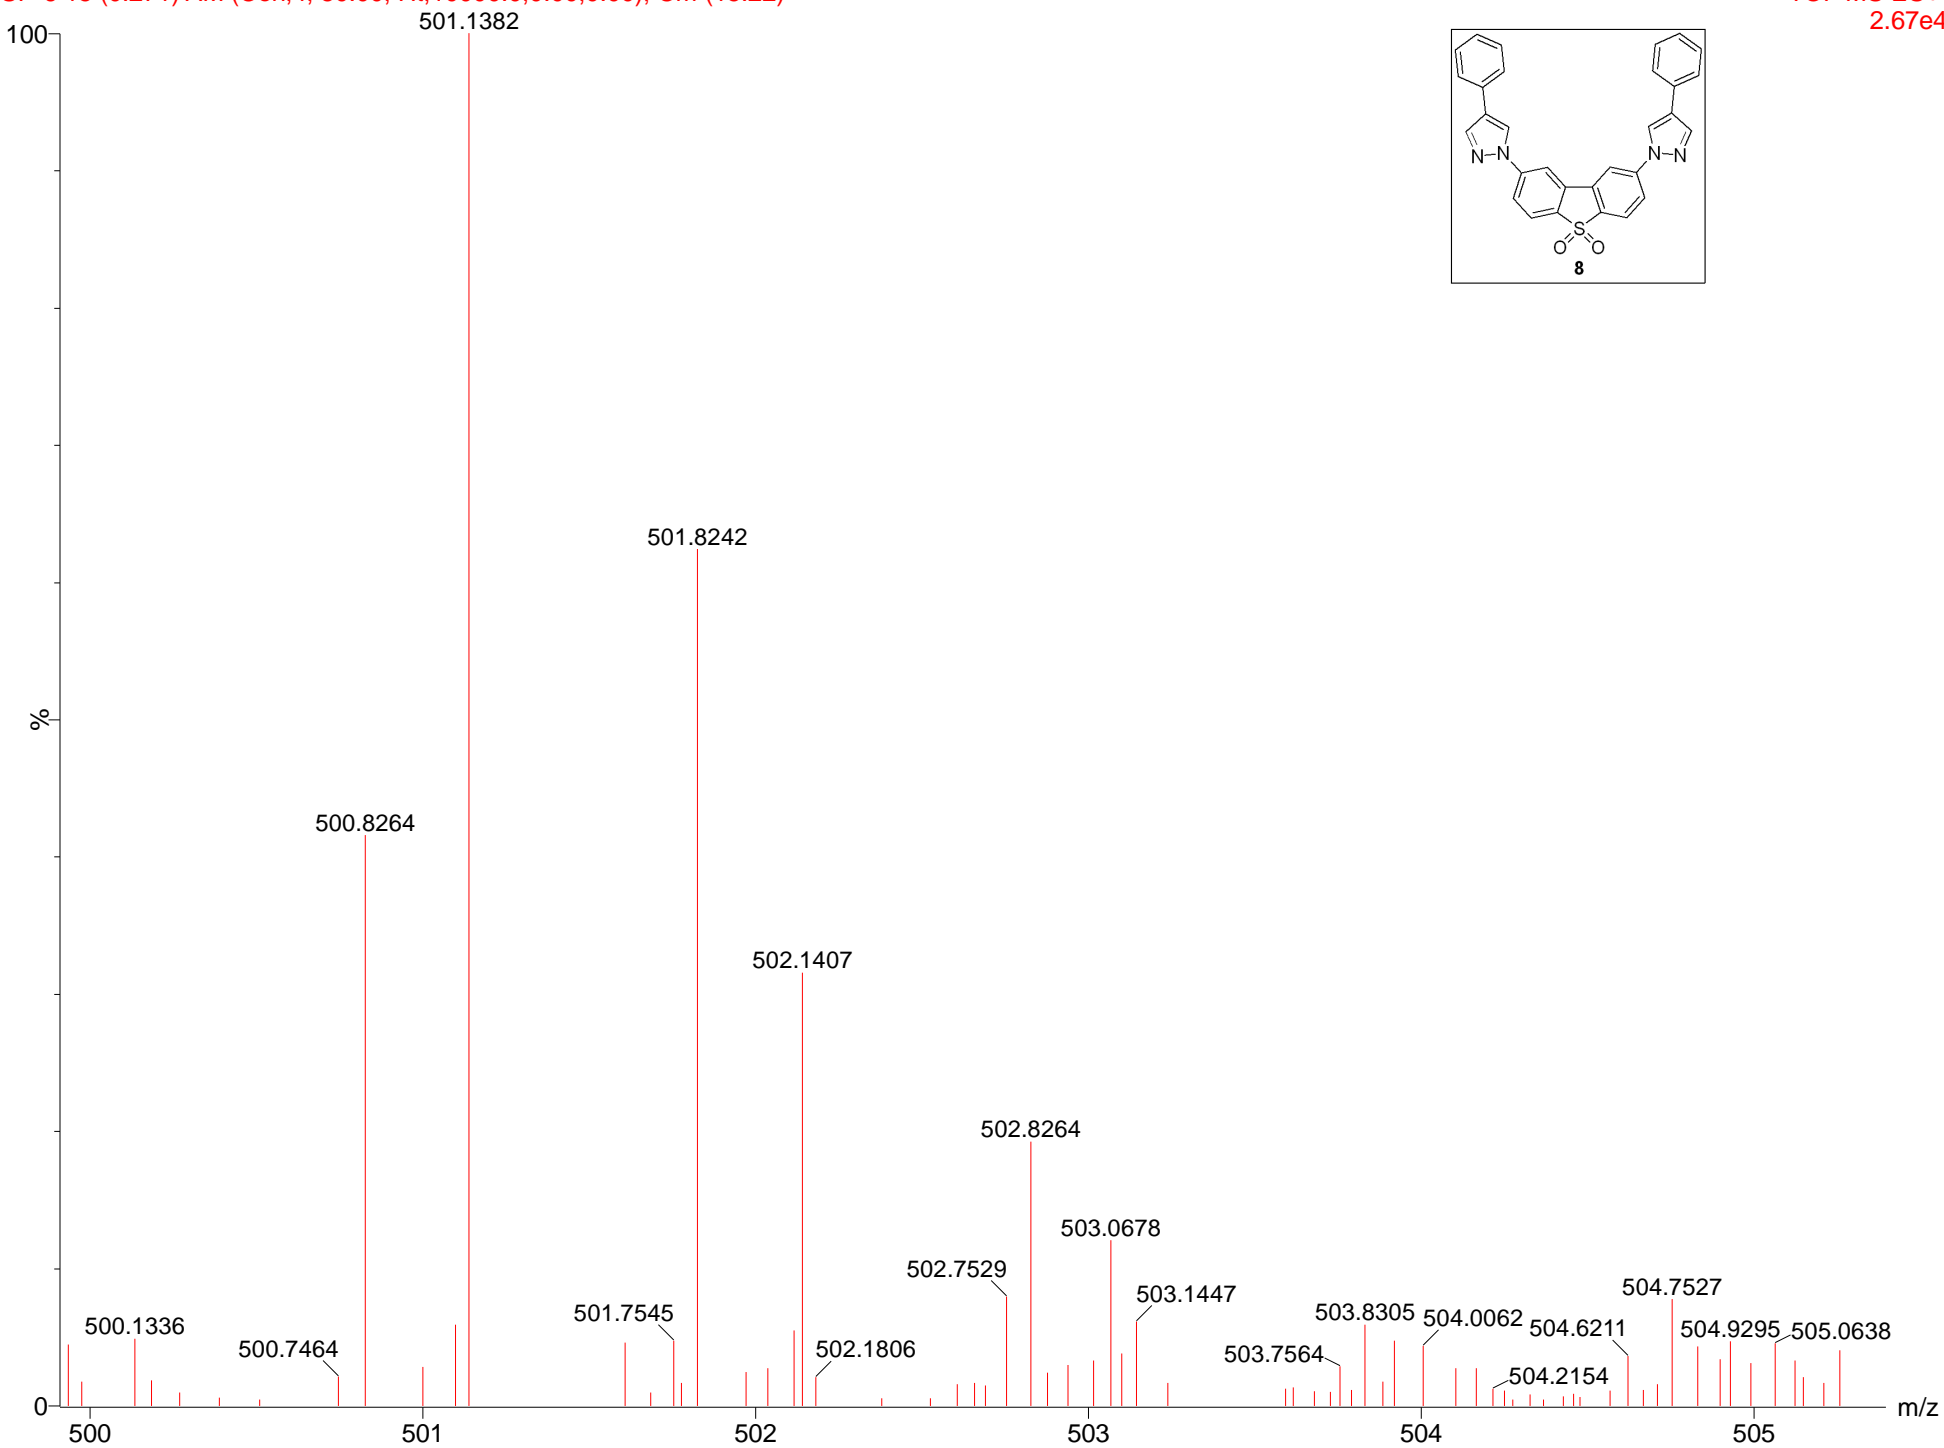

Supplement: d0nj01887b2.pdf [file d0nj01887b2.pdf]
